# Supplementary material for: Antenatal care for healthy pregnant women: a mapping of interventions from existing guidelines to inform the development of new WHO guidance on antenatal care
Source: PubMed Central journal article supplement — BJOG. 2015 Dec 23;123(4):519–28. doi: 10.1111/1471-0528.13820 (PMC5019265; doi:10.1111/1471-0528.13820), 2015-12-23
Supplement: BJO-123-519-s001.pdf [file BJO-123-519-s001.pdf]

**Table S1.** Interventions with recommendations in opposite directions among different guidelines

| Intervention                                     | Recommended? |    |
|--------------------------------------------------|--------------|----|
|                                                  | Yes          | No |
| Routine early ultrasound (1st and 2nd trimester) | 15           | 2  |
| Screening for Rubella                            | 14           | 1  |
| Screening for Gestational diabetes               | 12           | 3  |
| Screening for Group B Streptococcus              | 9            | 2  |
| Supplementation: Iron                            | 8            | 5  |
| Screening for Chlamydia                          | 8            | 2  |
| Auscultation of fetal heart                      | 8            | 1  |
| Routine late ultrasound and/or Doppler           | 7            | 3  |
| Advice for work                                  | 7            | 3  |
| Symphysis-fundal height measurement              | 7            | 2  |
| Advice for sexual intercourse                    | 7            | 1  |
| Advice for travelling                            | 7            | 1  |
| Screening for Cervical cancer                    | 6            | 1  |
| Screening for Toxoplasmosis                      | 4            | 6  |
| Screening for Hepatitis C                        | 4            | 4  |
| Supplementation: Vitamin D                       | 4            | 3  |
| Screening for Bacterial vaginosis                | 3            | 8  |
| Screening for Preterm labour                     | 3            | 4  |
| Screening for fetal wellbeing                    | 3            | 2  |
| Supplementation: Calcium                         | 3            | 2  |
| Vaccines: Rubella immunization                   | 3            | 1  |
| Breast examination                               | 2            | 3  |
| Supplementation: Vitamin A                       | 2            | 3  |
| Pelvic examination                               | 2            | 3  |
| Pelvimetry                                       | 2            | 2  |
| Prophylaxis: Preterm birth                       | 2            | 1  |
| Prophylaxis: Low dose aspirin                    | 2            | 1  |
| Advice for hot tubs and saunas                   | 2            | 1  |
| Screening for Cytomegalovirus                    | 1            | 4  |
| Screening for Parvovirus B19                     | 1            | 2  |
| Antenatal cardio-tocography                      | 1            | 2  |
| Urinalysis                                       | 1            | 2  |
| Vaccines: Varicella immunization                 | 1            | 1  |
